# Supplementary material
Source: PubMed Central journal article supplement (PMC2735585)
Supplement: NIHMS91443-supplement-1_si_001.pdf [file NIHMS91443-supplement-1_si_001.pdf]

# Effect of Linker Structure on Surface Density of Aptamer Monolayers and their Corresponding Protein Binding Efficiency

Subramanian Balamurugan, Anne Obubuafo, Robin L. McCarley, Steven A. Soper\*  
and David A. Spivak\*

*Department of Chemistry and Center for Biomolecular Multi-Scale Systems, Louisiana State University,  
Baton Rouge, LA 70803*

## Supplementary Information

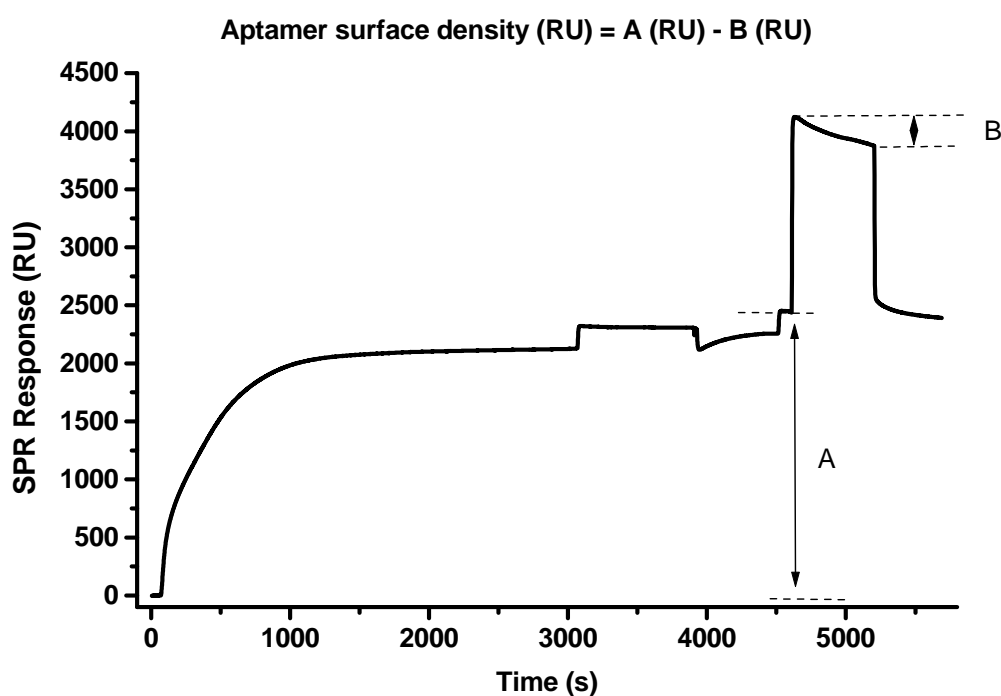

**Figure S-1:** A) SPR sensogram showing the formation 5'-C6-T5-A1 aptamer monolayer from sequential additions of 5'-C6-T5-A1 aptamer thiol to the gold surface in-vitro; B) Desorption from the addition of mercaptoethanol. Final aptamer density was found by subtracting the amount of desorbed aptamer from the original amount of aptamer immobilized in step A.

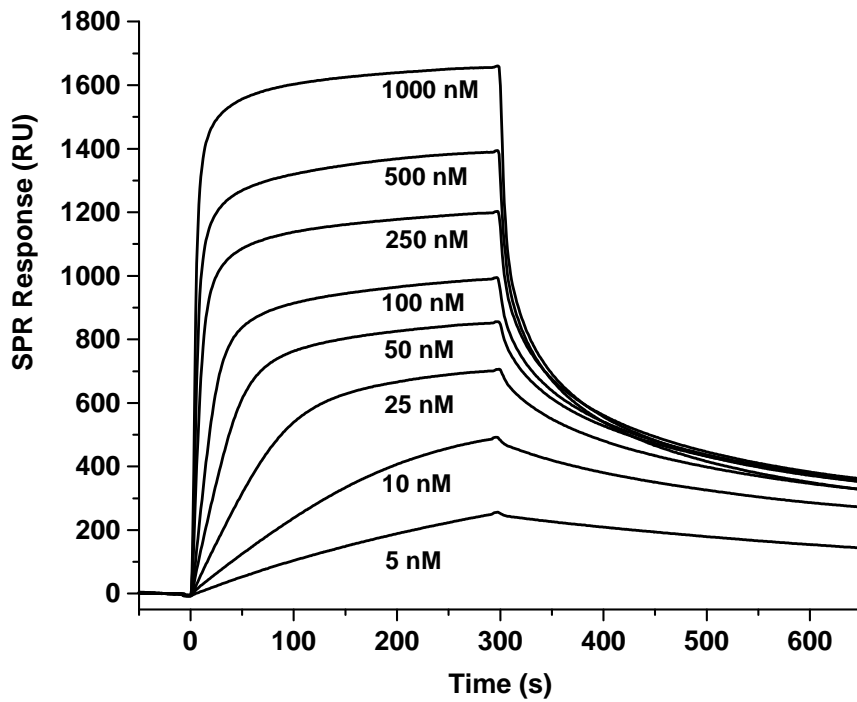

**Figure S-2:** Representative SPR sensograms for binding of different concentrations of thrombin onto a 5'-C<sub>6</sub>-T<sub>1</sub>-A<sub>1</sub> aptamer monolayer. Effective regeneration of the aptamer surface between analyses was achieved by removal of bound thrombin with 2 M NaCl.

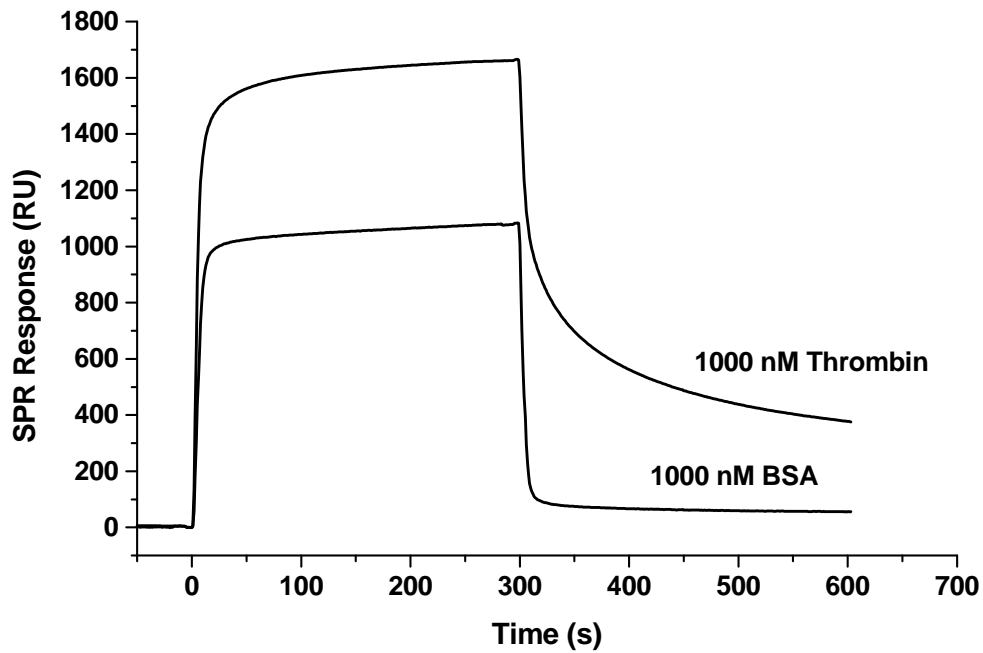

**Figure S-3:** SPR sensograms show the response of 5'-C<sub>6</sub>-T<sub>1</sub>-A<sub>1</sub> monolayer for 1000 nM thrombin and 1000 nM of BSA.
